# Supplementary material
Source: PubMed Central journal article supplement (PMC3065999)
Supplement: NIHMS275451-supplement-2_si_003.pdf [file NIHMS275451-supplement-2_si_003.pdf]

## Supporting Information

for

### New ultra-high affinity host-guest complexes of cucurbit[7]uril with bicyclo[2.2.2]octane and adamantane guests: Thermodynamic analysis and evaluation of M2 affinity calculations

Sarvin Moghaddam, Cheng Yang, Mikhail Rekharsky, Young Ho Ko, Kimoon Kim\*, Yoshihisa Inoue\*, Michael K. Gilson\*

#### Table of Contents

|                                                                                                                                                                                                  |     |
|--------------------------------------------------------------------------------------------------------------------------------------------------------------------------------------------------|-----|
| <b>Full form of Ref 10</b> .....                                                                                                                                                                 | S1  |
| <b>Experimental section</b> .....                                                                                                                                                                | S2  |
| <b>Scheme S1.</b> Synthetic route of bicyclo[2.2.2]octane derivatives.....                                                                                                                       | S2  |
| <b>Table S1.</b> Experimental Binding Constant, Standard Free Energy, Enthalpy, and Entropy Changes for Complexation of Ferrocene, Bicycloctane, and Adamantane Guests with Cucurbit[7]uril..... | S3  |
| <b>Figure S1.</b> <sup>1</sup> H NMR spectrum of BCO-1 .....                                                                                                                                     | S4  |
| <b>Figure S2.</b> <sup>13</sup> C NMR spectrum of BCO-1.....                                                                                                                                     | S5  |
| <b>Figure S3.</b> <sup>1</sup> H NMR spectrum of BCO-2.....                                                                                                                                      | S6  |
| <b>Figure S4.</b> <sup>13</sup> C NMR spectrum of BCO-2.....                                                                                                                                     | S7  |
| <b>Figure S5.</b> <sup>1</sup> H- <sup>1</sup> H COSY spectrum of BCO-2.....                                                                                                                     | S8  |
| <b>Figure S6.</b> <sup>1</sup> H NMR spectrum of BCO-3.....                                                                                                                                      | S9  |
| <b>Figure S7.</b> <sup>1</sup> H NMR spectrum of <b>B2</b> .....                                                                                                                                 | S10 |
| <b>Figure S8.</b> <sup>13</sup> C NMR spectrum of <b>B2</b> .....                                                                                                                                | S11 |
| <b>Figure S9.</b> <sup>1</sup> H NMR spectrum of BCO-4 .....                                                                                                                                     | S12 |
| <b>Figure S10.</b> <sup>13</sup> C NMR spectrum of BCO-4.....                                                                                                                                    | S13 |
| <b>Figure S11.</b> <sup>1</sup> H NMR spectrum of <b>B5</b> .....                                                                                                                                | S14 |
| <b>Figure S12.</b> <sup>1</sup> H NMR spectrum of <b>B11</b> .....                                                                                                                               | S15 |
| <b>Figure S13.</b> <sup>13</sup> C NMR spectrum of <b>B11</b> .....                                                                                                                              | S16 |
| <b>Figure S14.</b> HR Mass spectrum of <b>B5</b> .....                                                                                                                                           | S17 |
| <b>Figure S15.</b> HR Mass spectrum of <b>B11</b> .....                                                                                                                                          | S18 |
| <b>Figure 16.</b> Calorimetric titration of <b>A2</b> with CB[7].....                                                                                                                            | S19 |
| <b>Figure 17.</b> Calorimetric titration of <b>B2</b> with CB[7].....                                                                                                                            | S20 |
| <b>Figure 18.</b> Calorimetric titration of <b>B11</b> with CB[7].....                                                                                                                           | S21 |
| <b>References</b> .....                                                                                                                                                                          | S22 |

**Ref 10:** MacKerell, A.; Bashford, D.; Bellott, M.; Dunbrack, R.; Evanseck, J.; Field, M.; Fischer, S.; Gao, J.; Guo, H.; Ha, S.; Joseph-McCarthy, D.; Kuchnir, L.; Kuczera, K.; Lau, F.; Mattos, C.; Michnick, S.; Ngo, T.; Nguyen, D.; Prodhom, B.; Reiher, W.; Roux, B.; Schlenkrich, M.; Smith, J.; Stote, R.; Straub, J.; Watanabe, M.; Wiorkiewicz-Kuczera, J.; Yin, D.; Karplus, M. *J. Phys. Chem. B.* **1998**, *102*, 3586-3616.

## Experimental section

Bicyclo[2.2.2]octane derivatives were synthesized as illustrated in Scheme S1, according to the procedures reported in the references S1-S3.

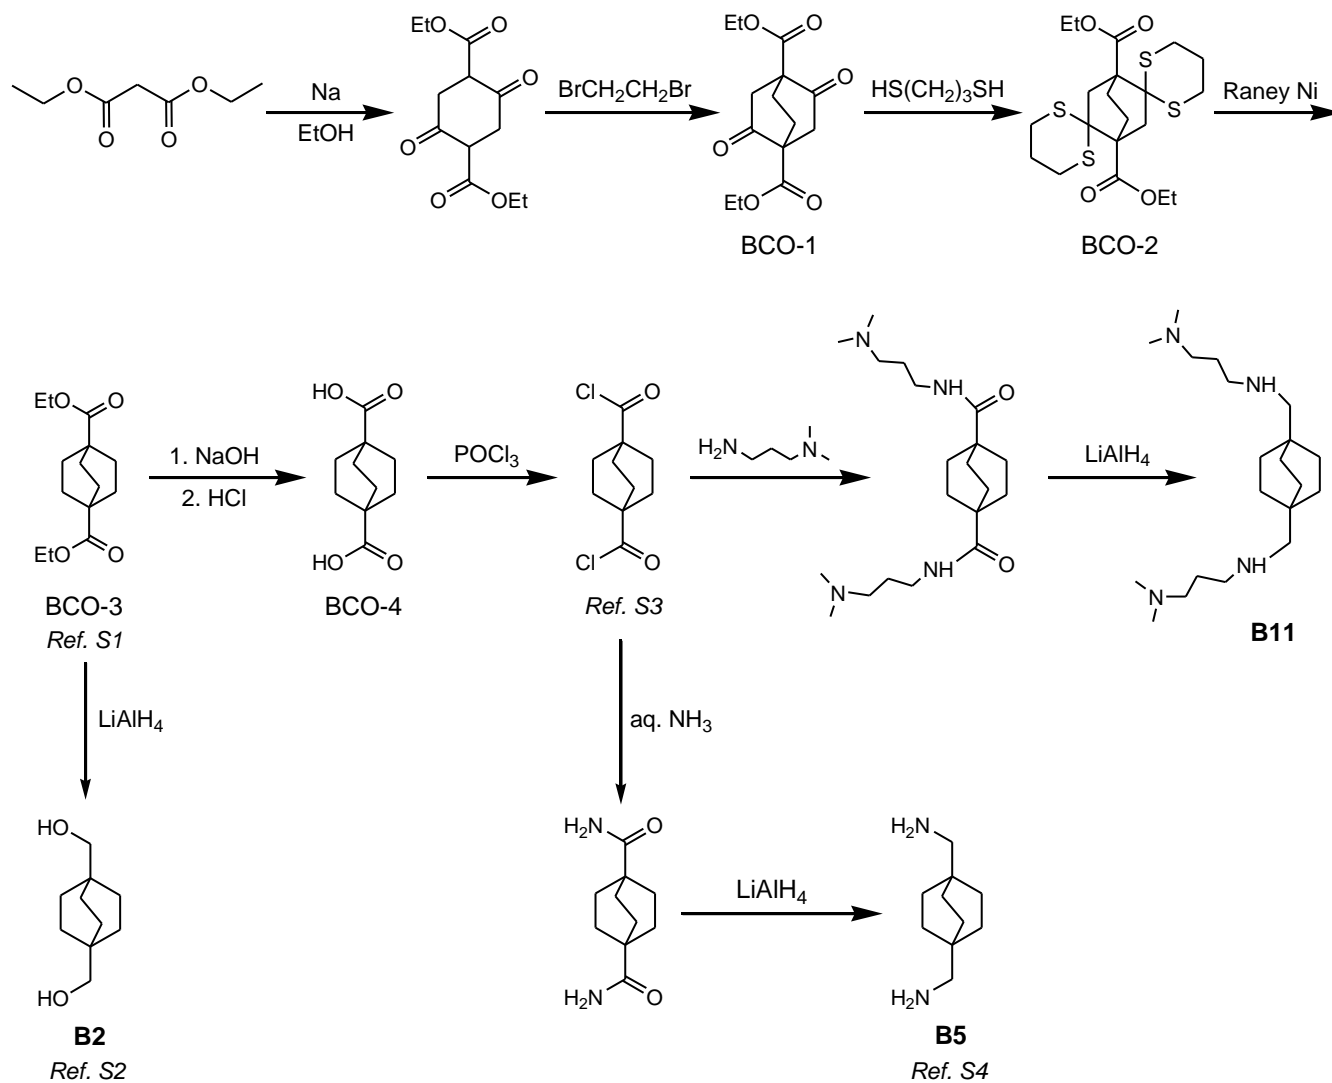

**Scheme S1.** Synthetic route for bicyclo[2.2.2]octane derivatives.

**Table S1.** Experimental Complex Stability Constant ( $K$ ), Standard Free Energy ( $\Delta G^\circ$ ), Enthalpy ( $\Delta H^\circ$ ), and Entropy Changes ( $T\Delta S^\circ$ ) for Complexation of Various Ferrocene, Bicyclo[2.2.2]octane, and Adamantane Guests with Cucurbit[7]uril in H<sub>2</sub>O at  $T = 298.15\text{ K}^a$

| guest <sup>charge</sup>                                                                                                                                    | $K/M^{-1}$                     | $\Delta G^\circ$<br>/kcal mol <sup>-1</sup> | $\Delta H^\circ$<br>/kcal mol <sup>-1</sup> | $T\Delta S^\circ$<br>/kcal mol <sup>-1</sup> |
|------------------------------------------------------------------------------------------------------------------------------------------------------------|--------------------------------|---------------------------------------------|---------------------------------------------|----------------------------------------------|
| ferrocenylCH <sub>2</sub> OH ( <b>F1</b> )                                                                                                                 | $(3.3 \pm 0.5) \times 10^9$    | $-13.0 \pm 0.1$                             | $-21.5 \pm 0.5$                             | $-8.6 \pm 0.5$                               |
| ferroceneCH <sub>2</sub> N <sup>+</sup> HMe <sub>2</sub> ( <b>F2</b> )                                                                                     | $(2.4 \pm 0.8) \times 10^{12}$ | $-16.9 \pm 0.2$                             | $-21.0 \pm 0.5$                             | $-4.1 \pm 0.5$                               |
| ferroceneCH <sub>2</sub> N <sup>+</sup> Me <sub>3</sub> ( <b>F3</b> )                                                                                      | $(4.1 \pm 1.0) \times 10^{12}$ | $-17.2 \pm 0.2$                             | $-21.5 \pm 0.2$                             | $-4.3 \pm 0.5$                               |
| 1,1'-bis(CH <sub>2</sub> NMe <sub>3</sub> ) <sub>2</sub> ferrocene <sup>2+</sup> ( <b>F6</b> )                                                             | $(3.2 \pm 1.0) \times 10^{15}$ | $-21.1 \pm 0.2$                             | $-21.5 \pm 0.2$                             | $-0.5 \pm 0.5$                               |
| 1,4-bis(hydroxymethyl)bicyclo[2.2.2]octane <sup>0</sup> ( <b>B2</b> )                                                                                      | $(6.1 \pm 0.5) \times 10^9$    | $-13.4 \pm 0.1$                             | $-15.8 \pm 0.2$                             | $-2.4 \pm 0.2$                               |
| 1,4-bis(aminomethyl)bicyclo[2.2.2]octane <sup>2+</sup> ( <b>B5</b> )                                                                                       | $(2.0 \pm 0.5) \times 10^{14}$ | $-19.5 \pm 0.2$                             | $-15.6 \pm 0.4$                             | $3.9 \pm 0.5$                                |
| 1,4-bis(Me <sub>2</sub> NCH <sub>2</sub> CH <sub>2</sub> CH <sub>2</sub> NCH <sub>2</sub> ) <sub>2</sub> bicyclo[2.2.2]octane <sup>4+</sup> ( <b>B11</b> ) | $(1.2 \pm 0.5) \times 10^{15}$ | $-20.6 \pm 0.4$                             | $-16.3 \pm 0.4$                             | $4.3 \pm 0.5$                                |
| 1-adamantanol <sup>0</sup> ( <b>A1</b> )                                                                                                                   | $(2.3 \pm 0.8) \times 10^{10}$ | $-14.1 \pm 0.2$                             | $-19.0 \pm 0.4$                             | $-4.9 \pm 0.4$                               |
| 1-adamantylamine <sup>1+</sup> ( <b>A2</b> )                                                                                                               | $(1.7 \pm 0.8) \times 10^{14}$ | $-19.4 \pm 0.1$                             | $-19.3 \pm 0.4$                             | $0.1 \pm 0.5$                                |
| 1-aminomethyladamantane <sup>1+</sup> ( <b>A3</b> )                                                                                                        | $9 \times 10^{14}{}^b$         | $-20.3{}^b$                                 | $-21.9 \pm 0.4$                             | $-1.7$                                       |
| 1-(2-aminoethylamino)adamantane <sup>2+</sup> ( <b>A4</b> )                                                                                                | $5 \times 10^{15}{}^b$         | $-21.5{}^b$                                 | $-20.1 \pm 0.4$                             | $1.4$                                        |
| 2-adamantylamine <sup>1+</sup> ( <b>A5</b> )                                                                                                               | $(1.0 \pm 0.3) \times 10^{14}$ | $-19.1 \pm 0.2$                             | $-19.5 \pm 0.4$                             | $-0.4 \pm 0.5$                               |

<sup>a</sup> Determined in pure water at 298.15 K by isothermal titration calorimetry (ITC-VT, Microcal), unless stated otherwise. <sup>b</sup> Binding constant was determined by NMR in the presence of competitor, while the enthalpic change was determined by microcalorimetry.

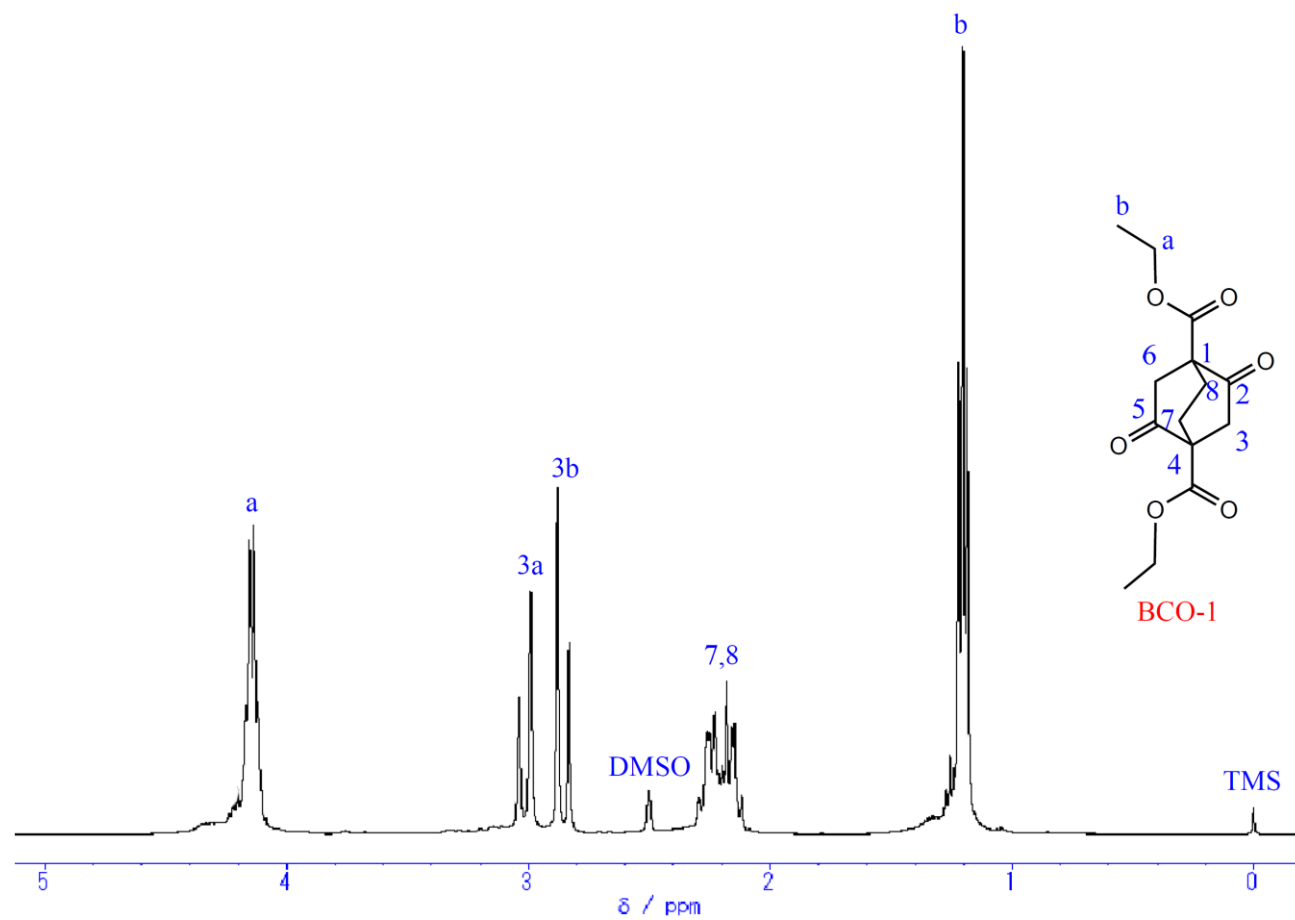

**Figure S1.**  $^1\text{H}$  NMR spectrum of BCO-1 in  $\text{DMSO-}d_6$  measured at 20 °C.

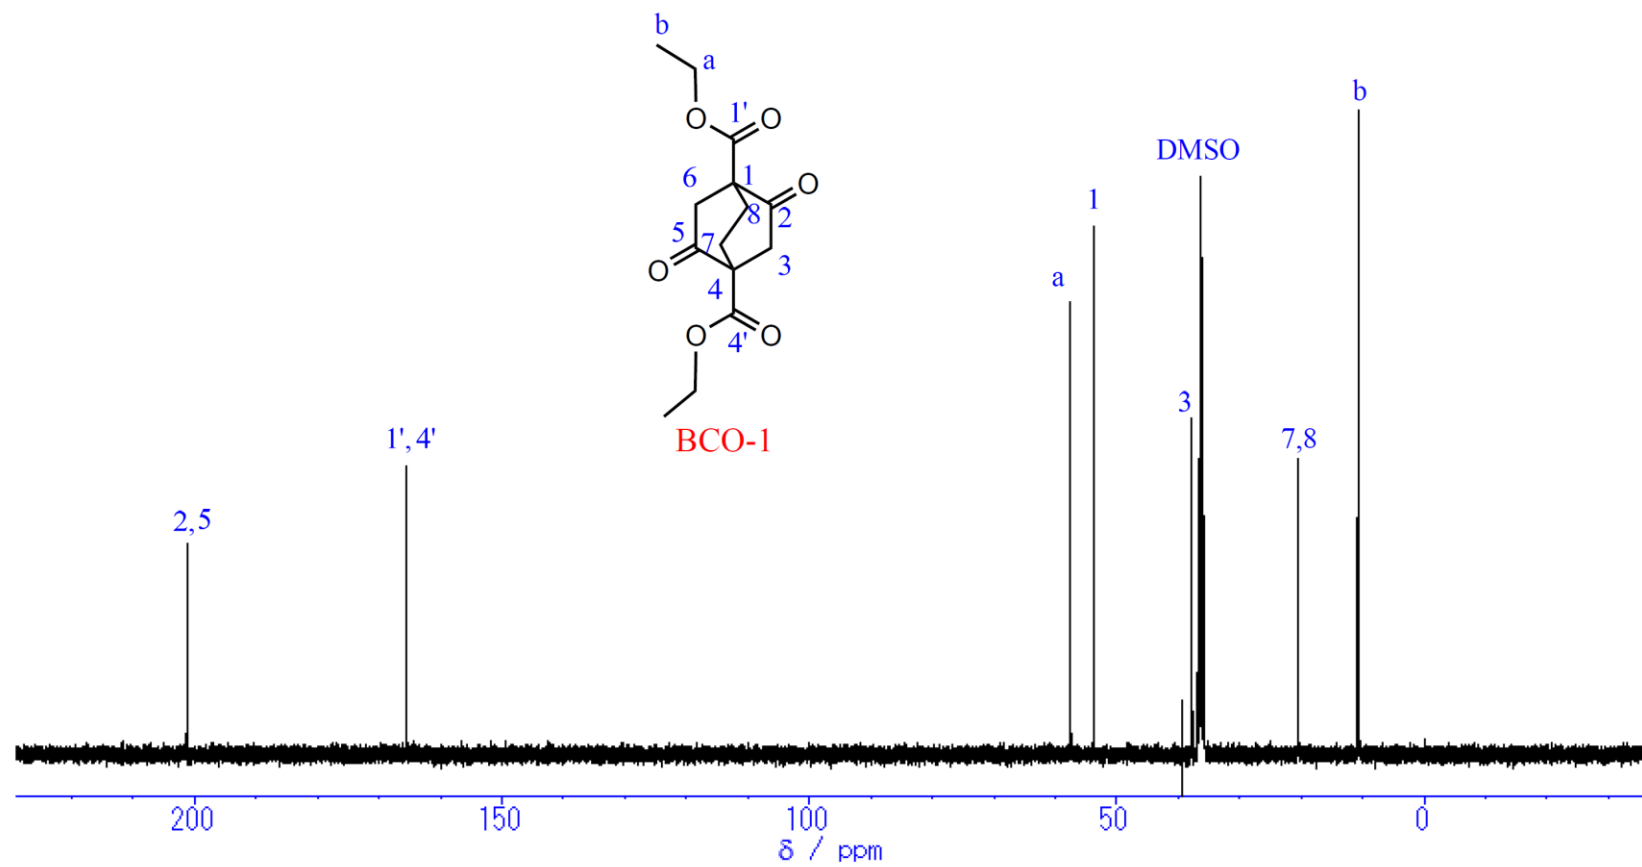

**Figure S2.** <sup>13</sup>C NMR spectrum of BCO-1 in DMSO-*d*<sub>6</sub> measured at 20 °C.

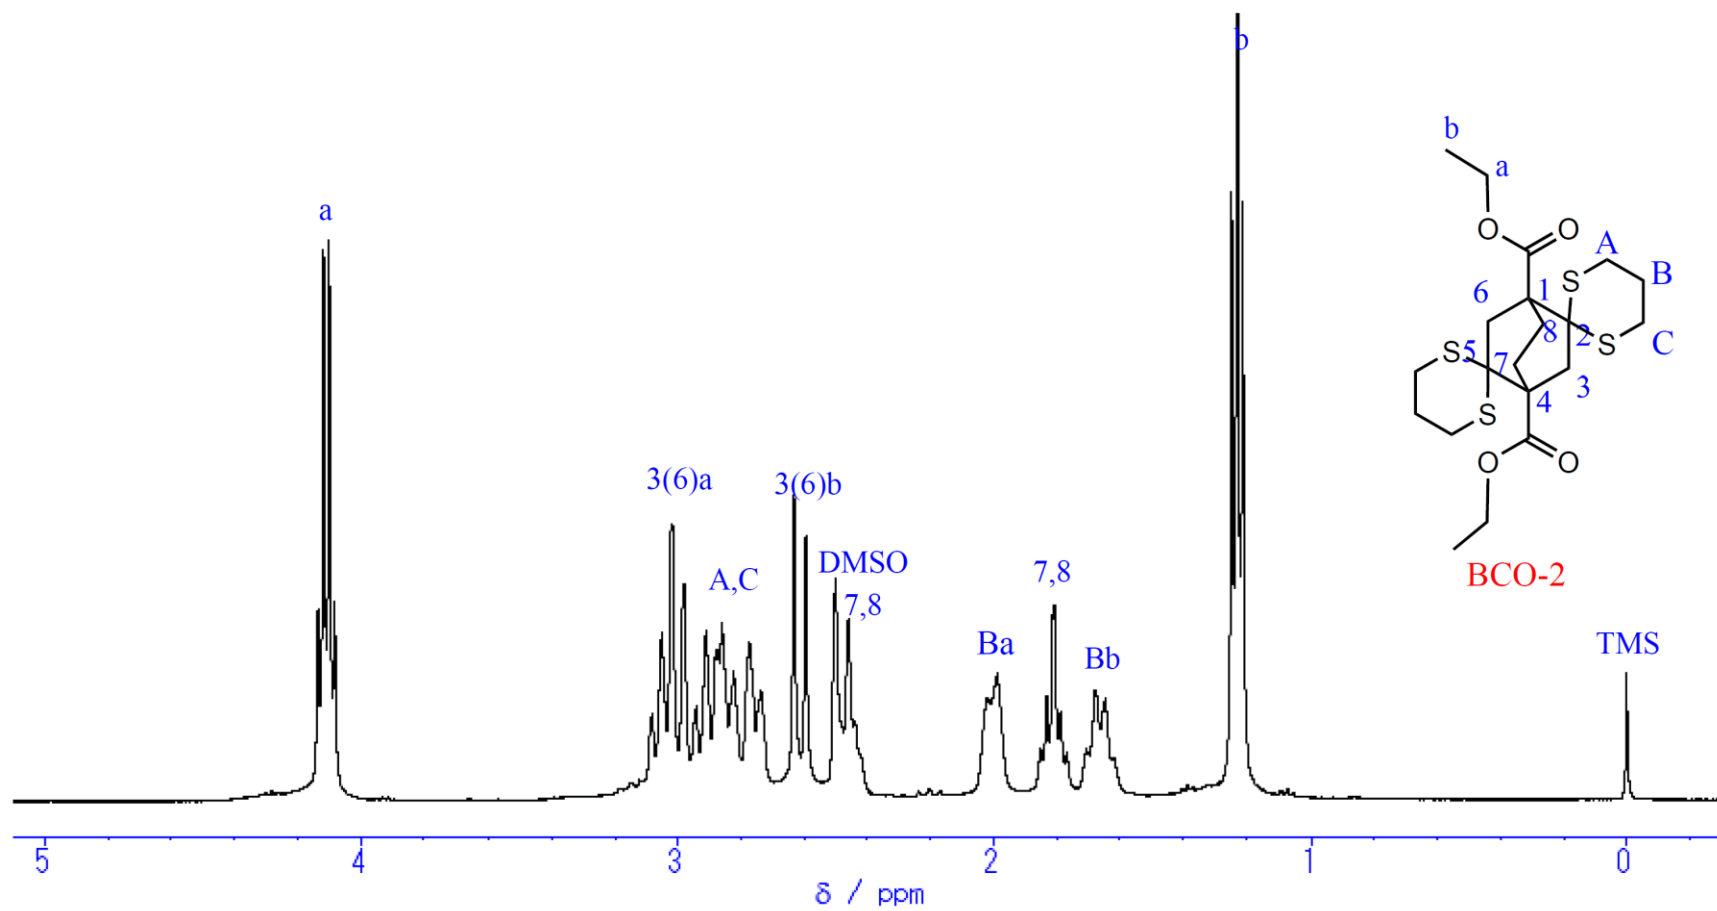

**Figure S3.**  $^1\text{H}$  NMR spectrum of BCO-2 measured in  $\text{DMSO-}d_6$  at  $20\text{ }^\circ\text{C}$ .

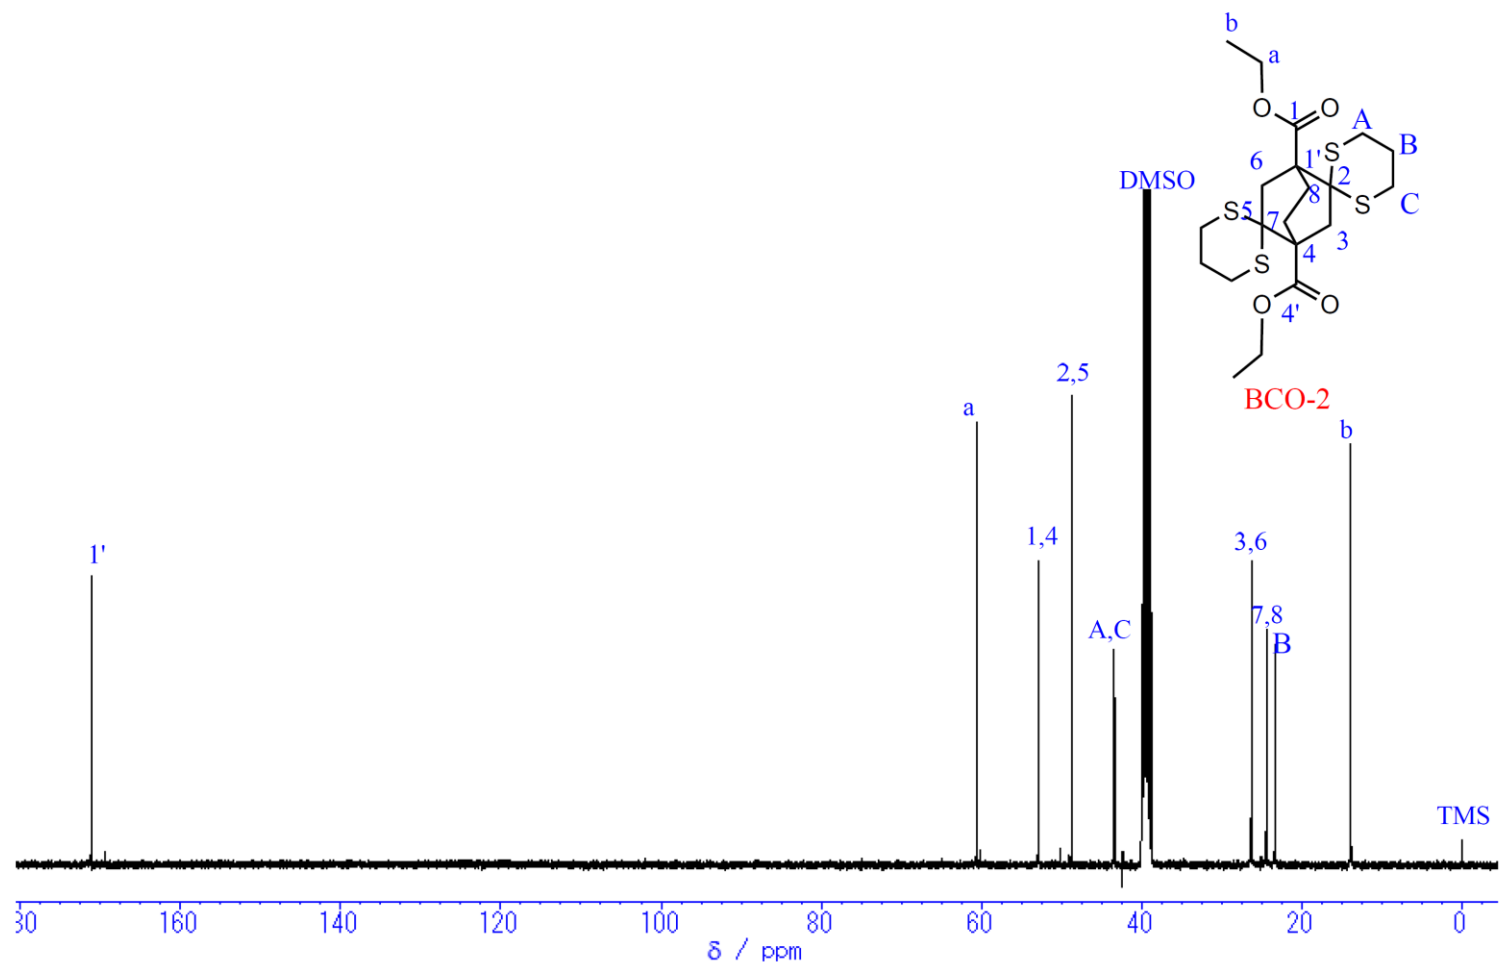

**Figure S4.**  $^{13}\text{C}$  NMR spectrum of BCO-2 measured in  $\text{DMSO-}d_6$  at 20 °C.

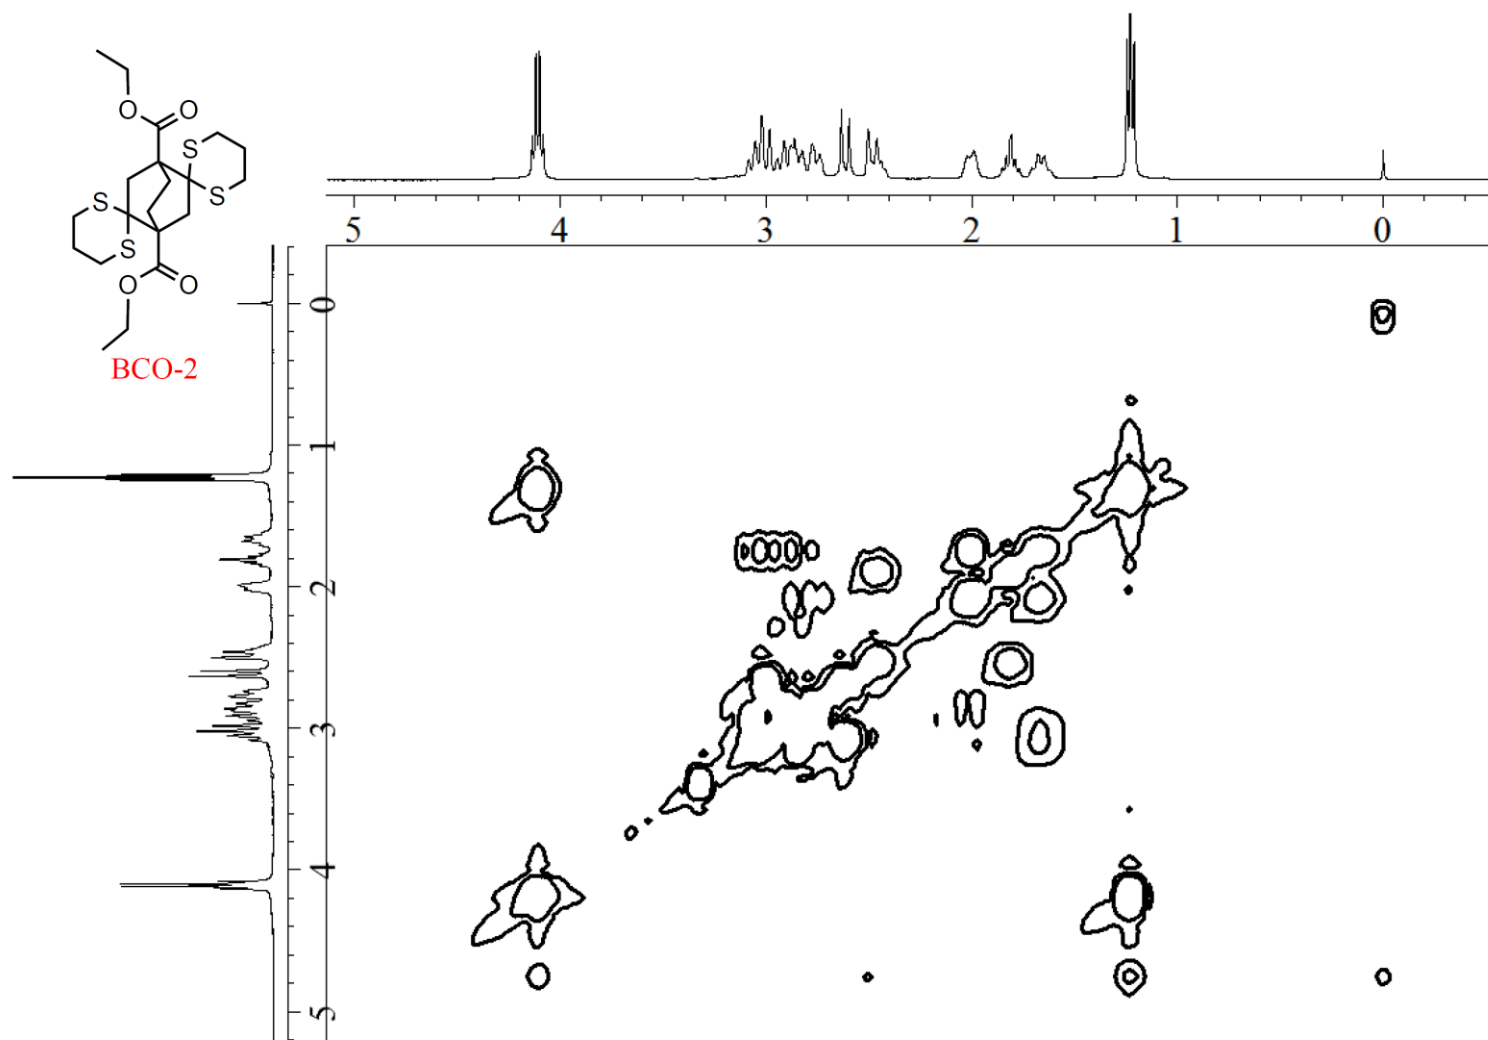

**Figure S5.**  $^1\text{H}$ - $^1\text{H}$  COSY spectrum of BCO-2 measured in  $\text{DMSO-}d_6$  at 20 °C.



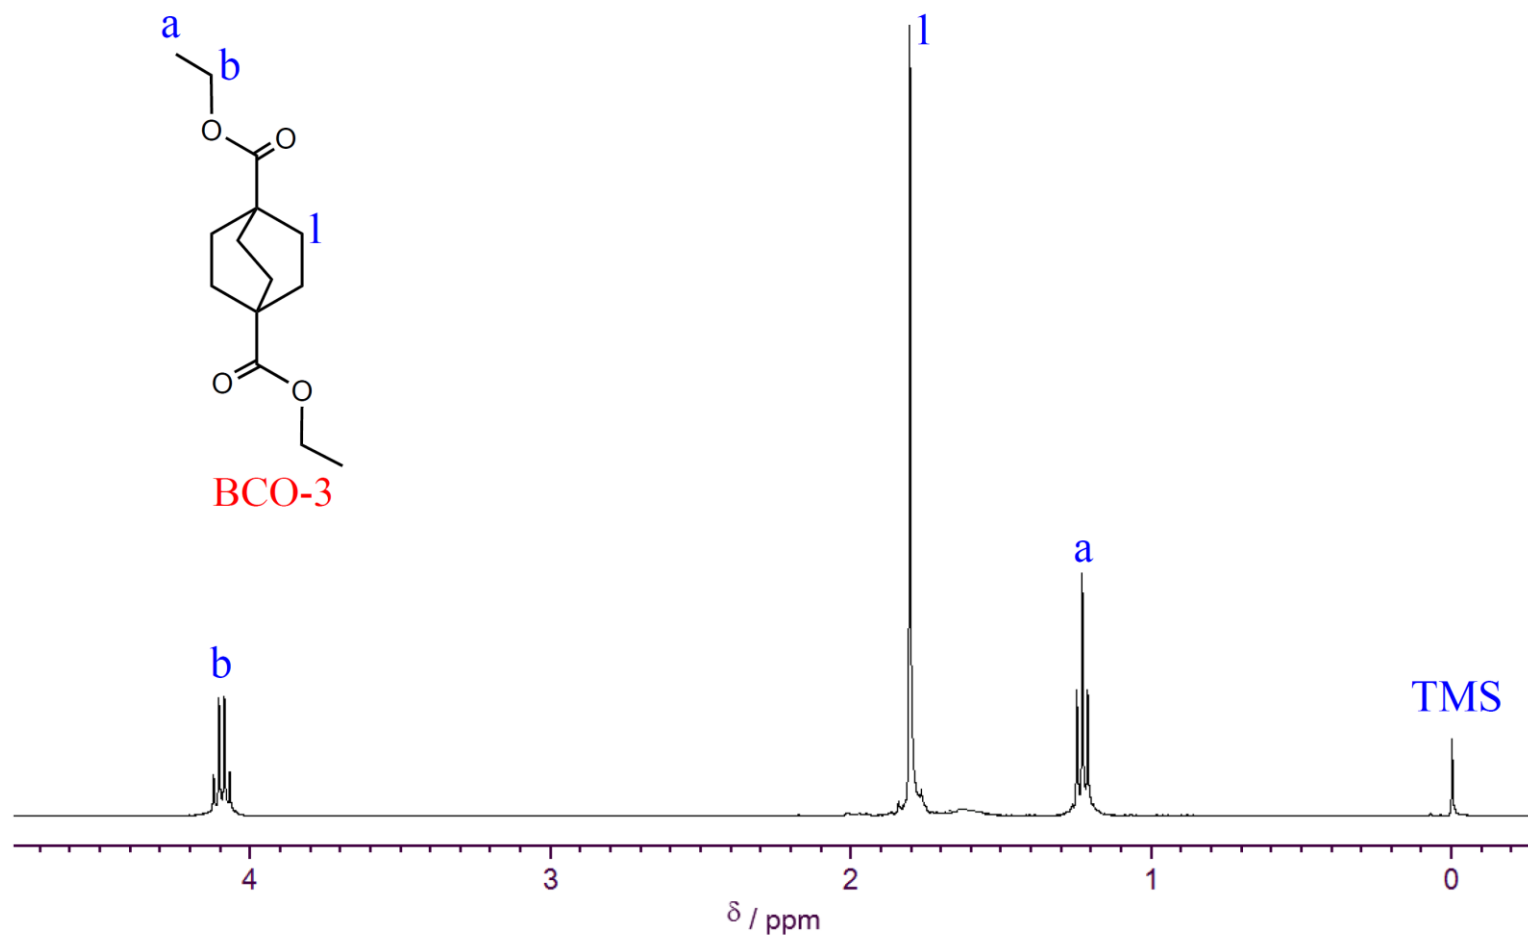

**Figure S6.** <sup>1</sup>H NMR spectrum of BCO-3 measured in CDCl<sub>3</sub> at 20 °C.

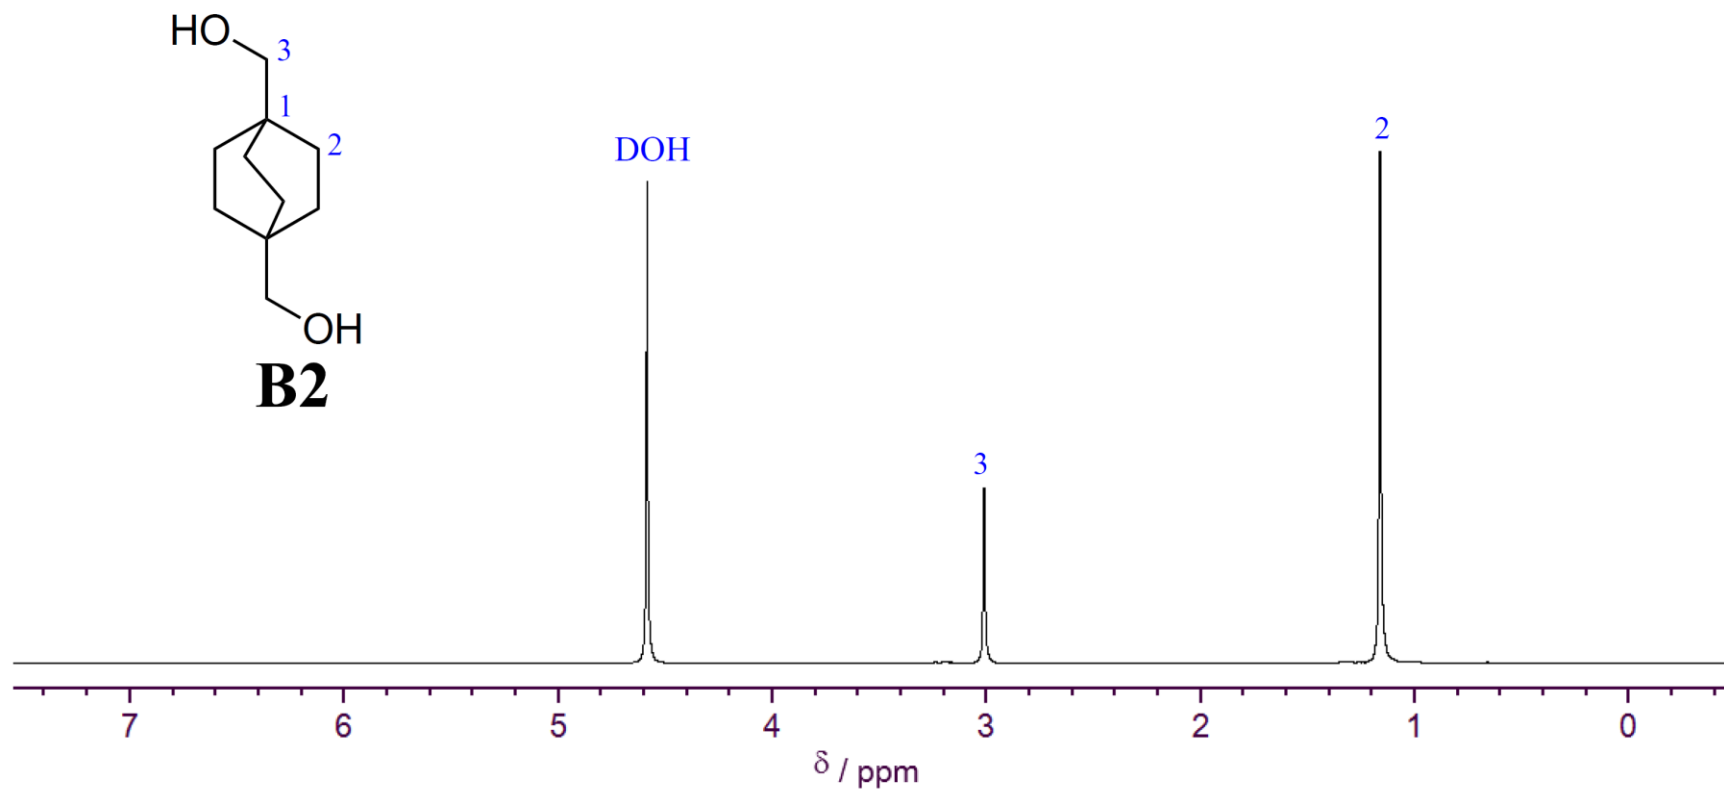

**Figure S7.** <sup>1</sup>H NMR spectrum of **B2** measured in CDCl<sub>3</sub> at 20 °C.

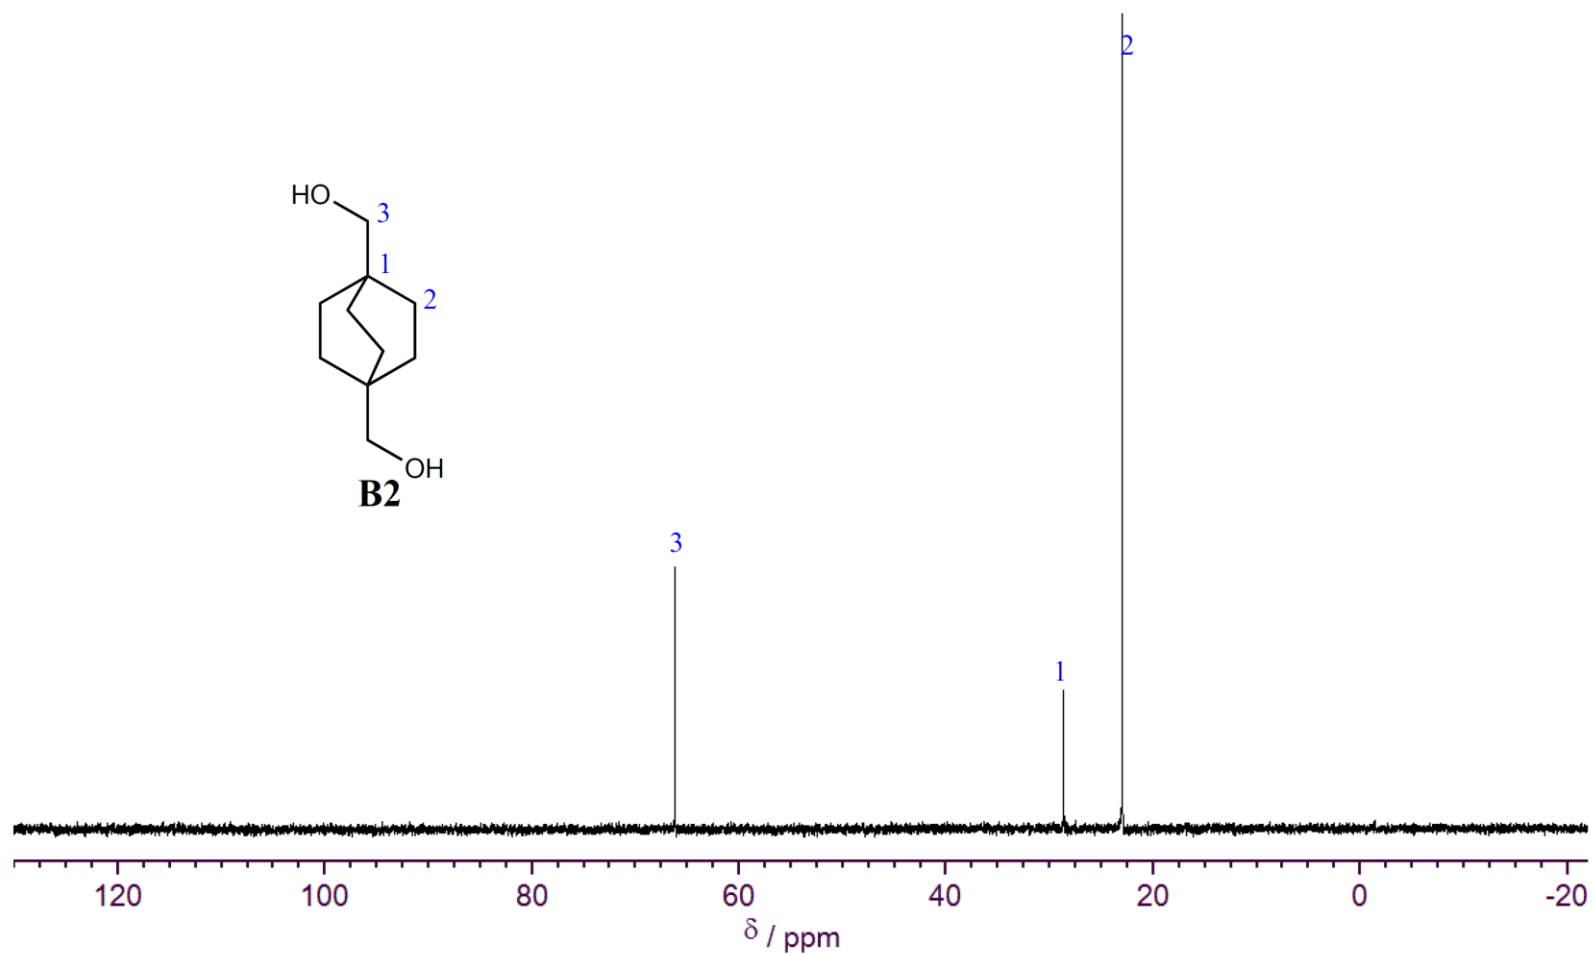

**Figure S8.**  $^{13}\text{C}$  NMR spectrum of **B2** measured in  $\text{DMSO-}d_6$  at  $20\text{ }^\circ\text{C}$ .

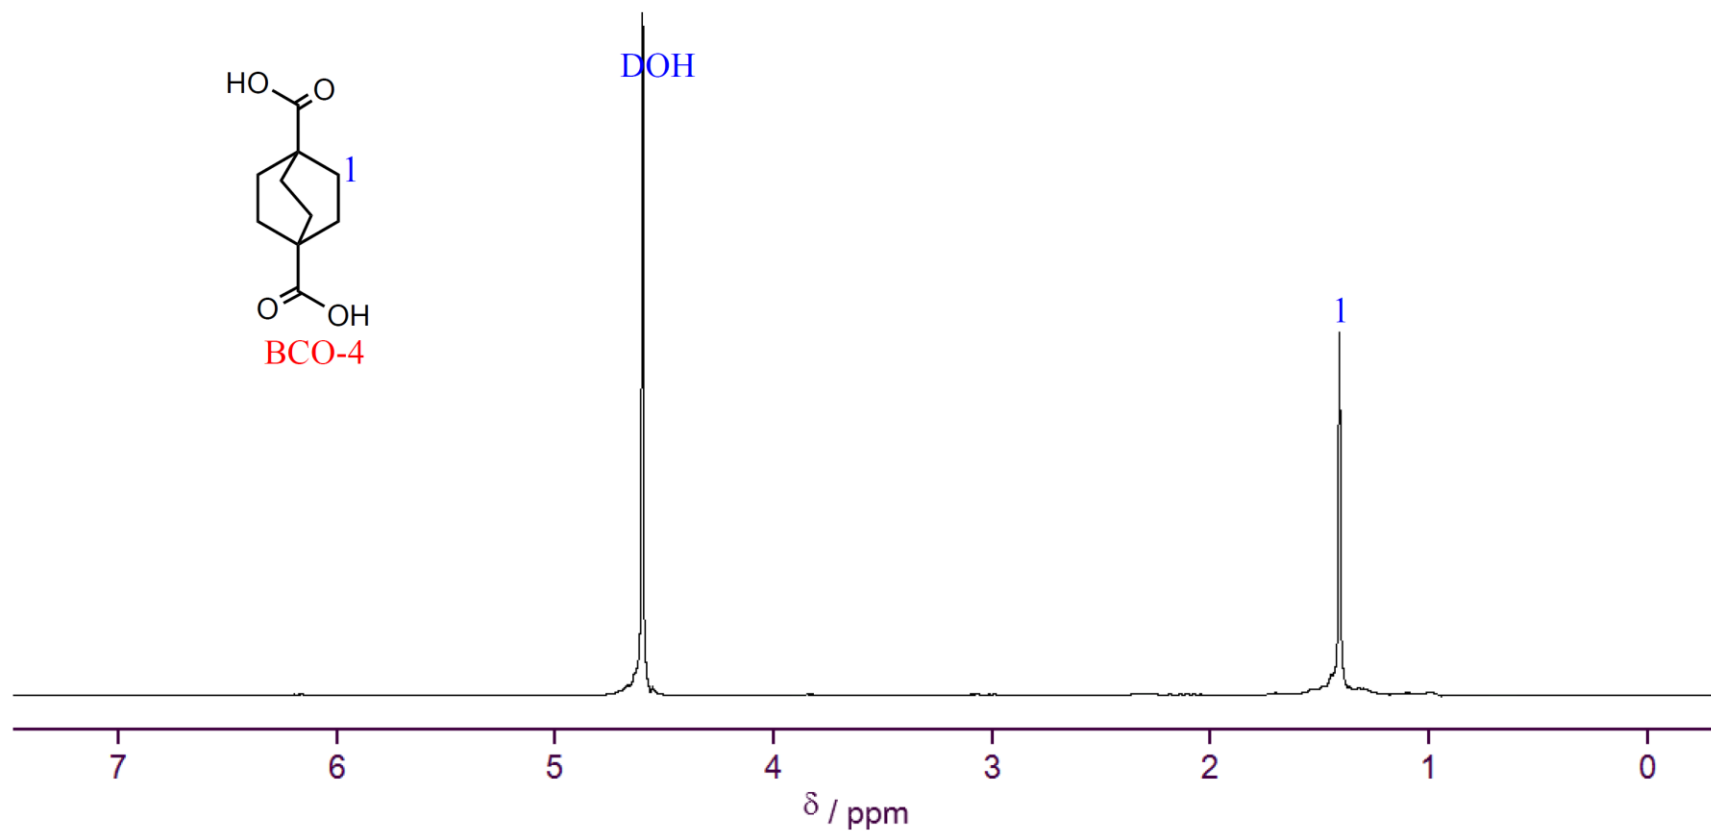

**Figure S9.**  $^1\text{H}$  NMR spectrum of BCO-4 measured in  $\text{D}_2\text{O}$  at  $20\text{ }^\circ\text{C}$ .

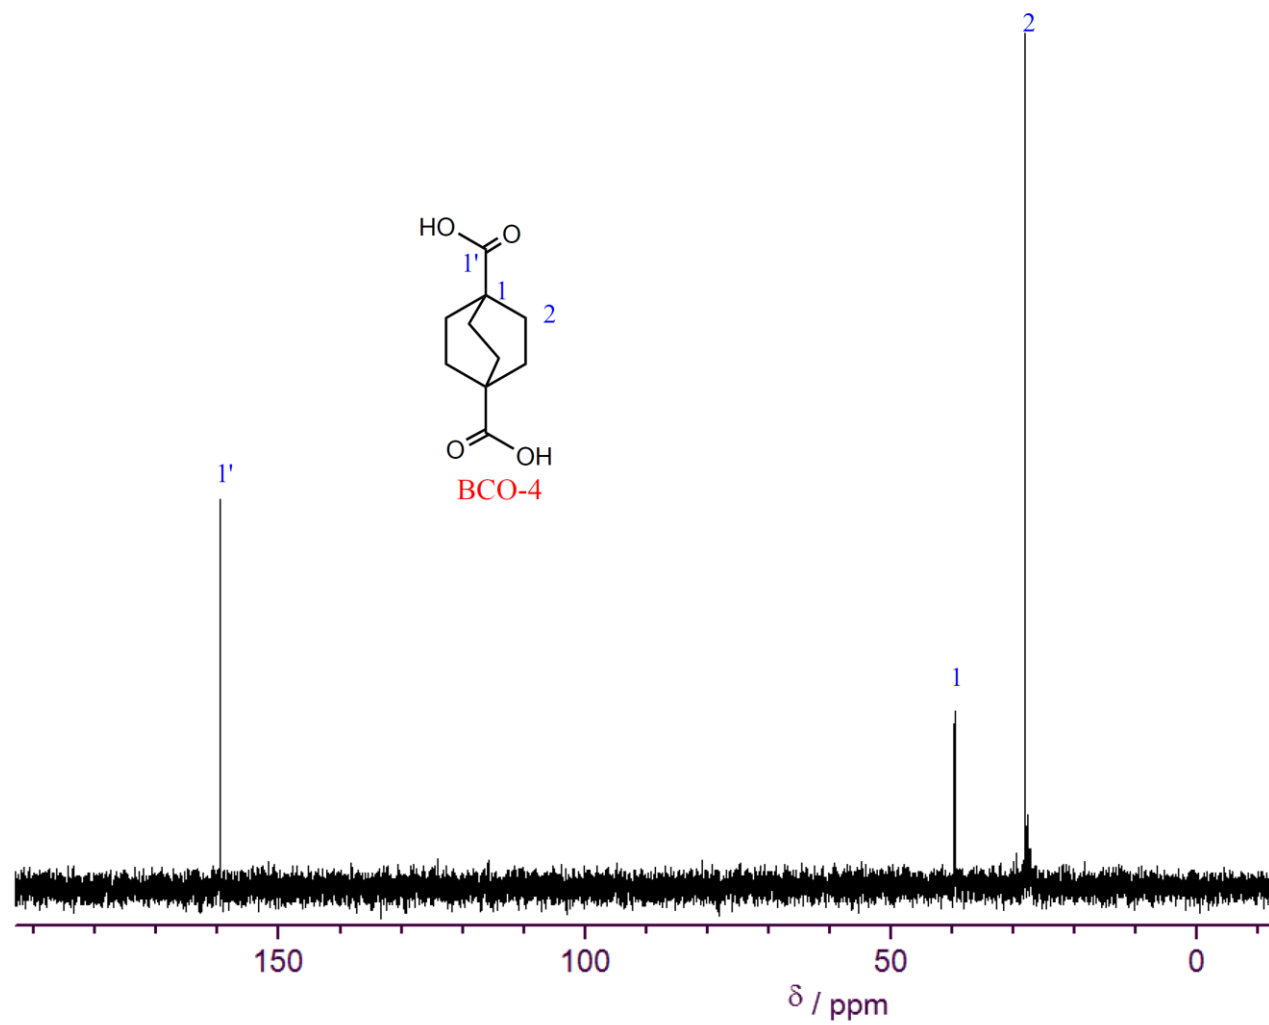

**Figure S10.** <sup>13</sup>C NMR spectrum of BCO-4 measured in D<sub>2</sub>O at 20 °C.

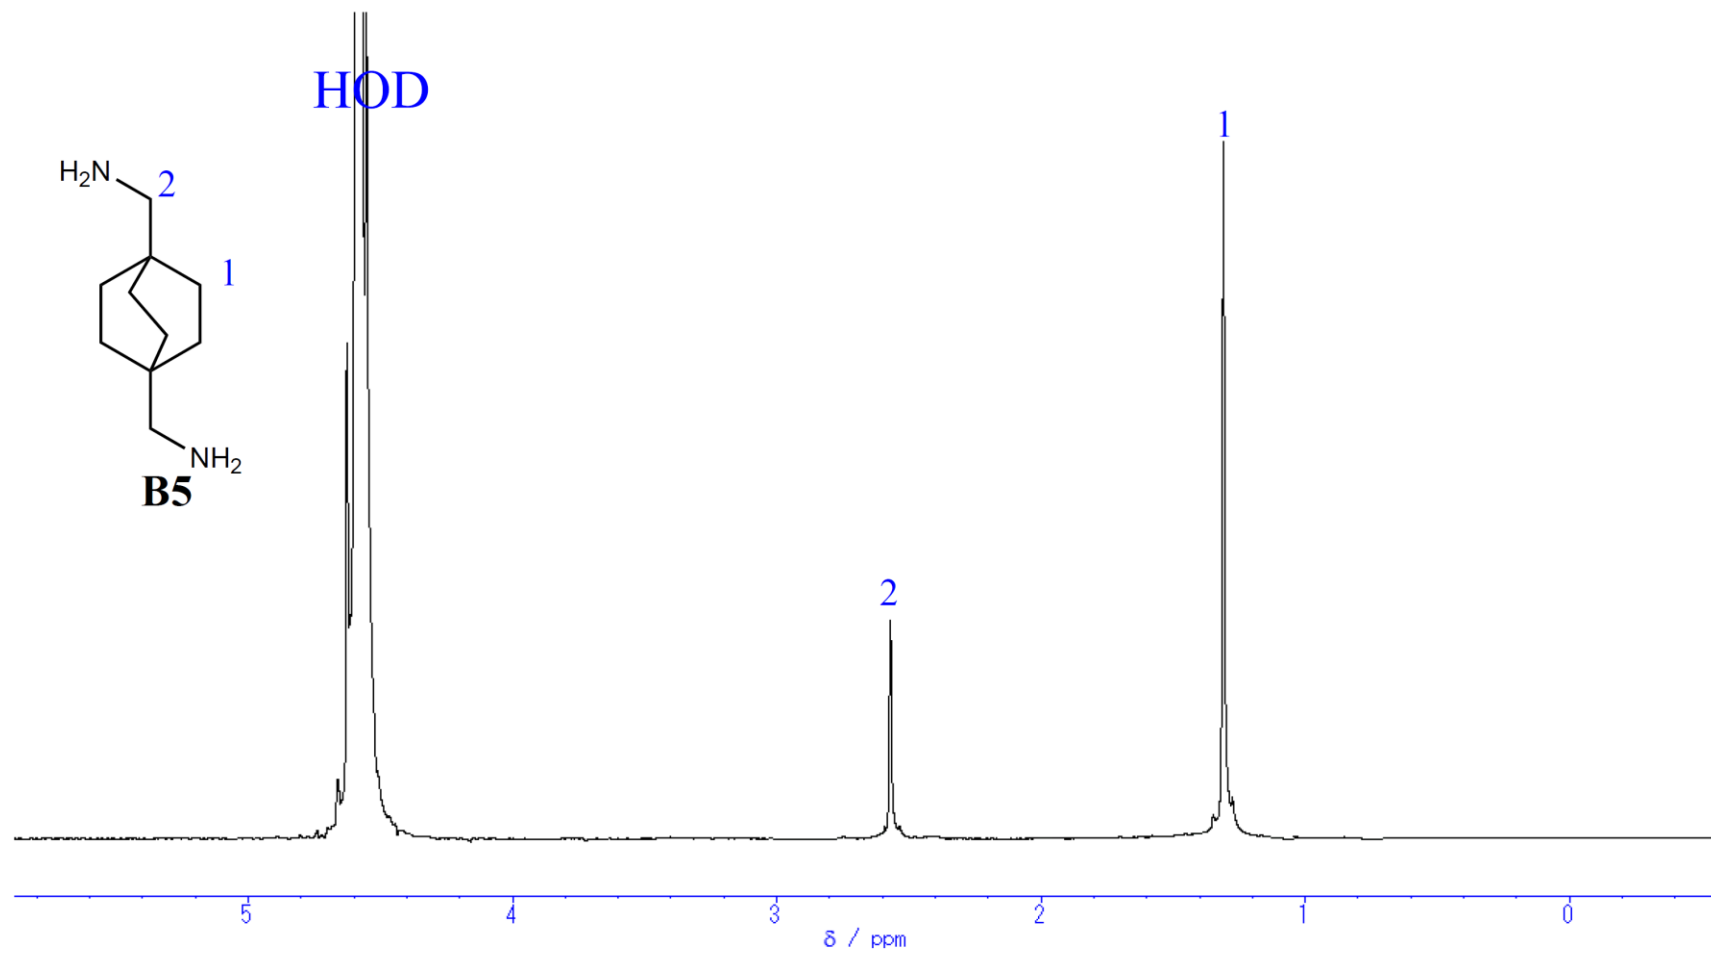

**Figure S11.**  $^1\text{H}$  NMR spectrum of **B5** measured in  $\text{D}_2\text{O}$  at  $20\text{ }^\circ\text{C}$ .

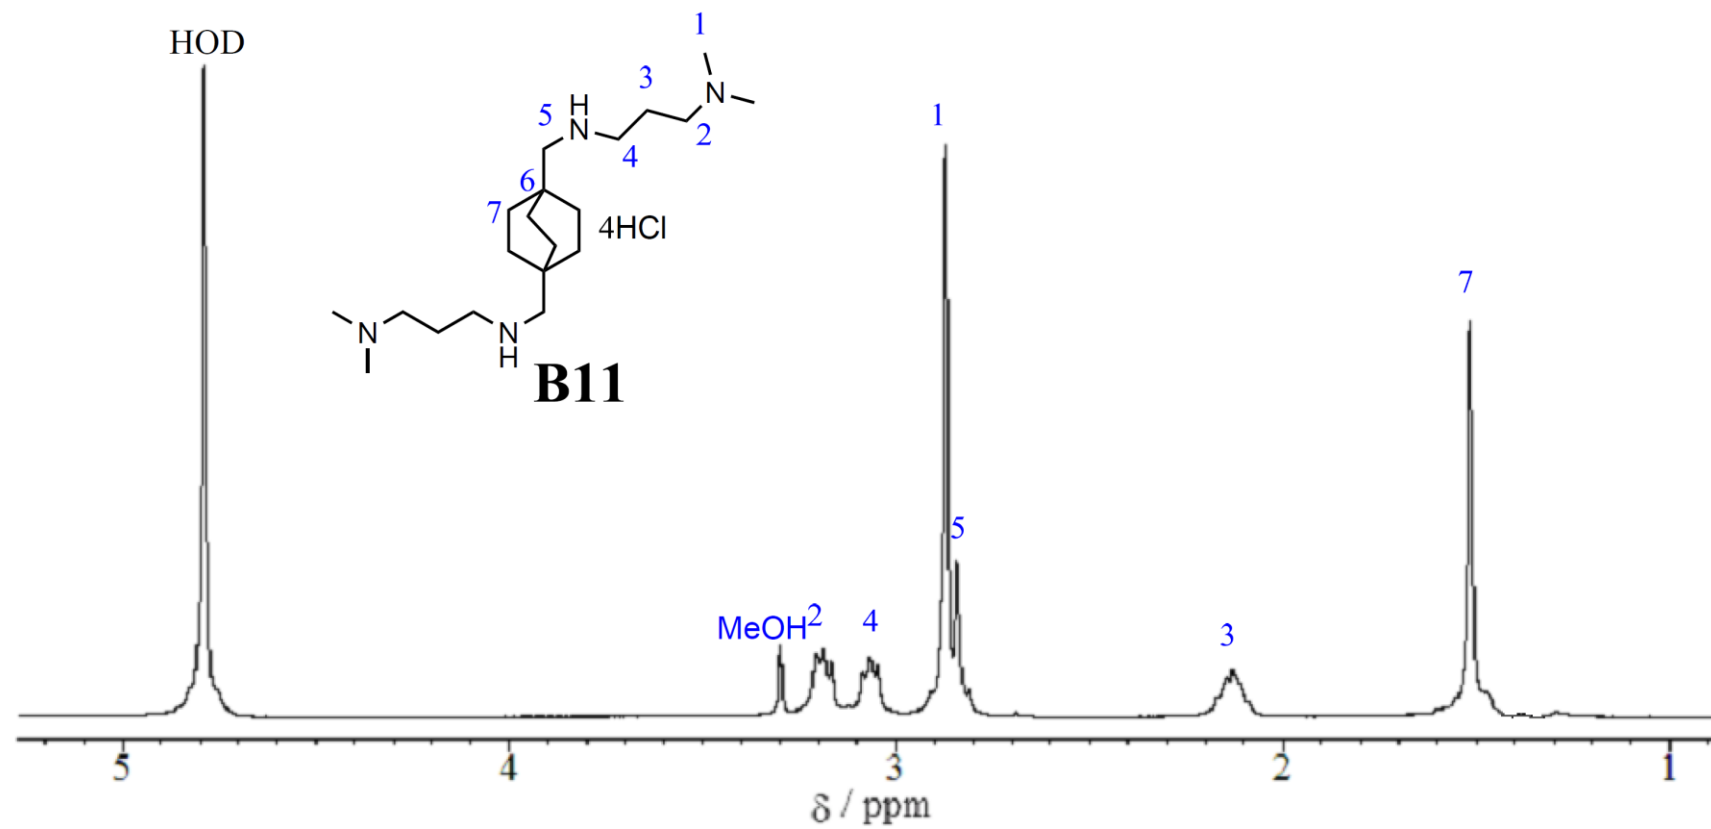

**Figure S12.**  $^1\text{H}$  NMR spectrum of **B11** measured in  $\text{D}_2\text{O}$  at  $20^\circ\text{C}$  with MeOH added as an internal standard.

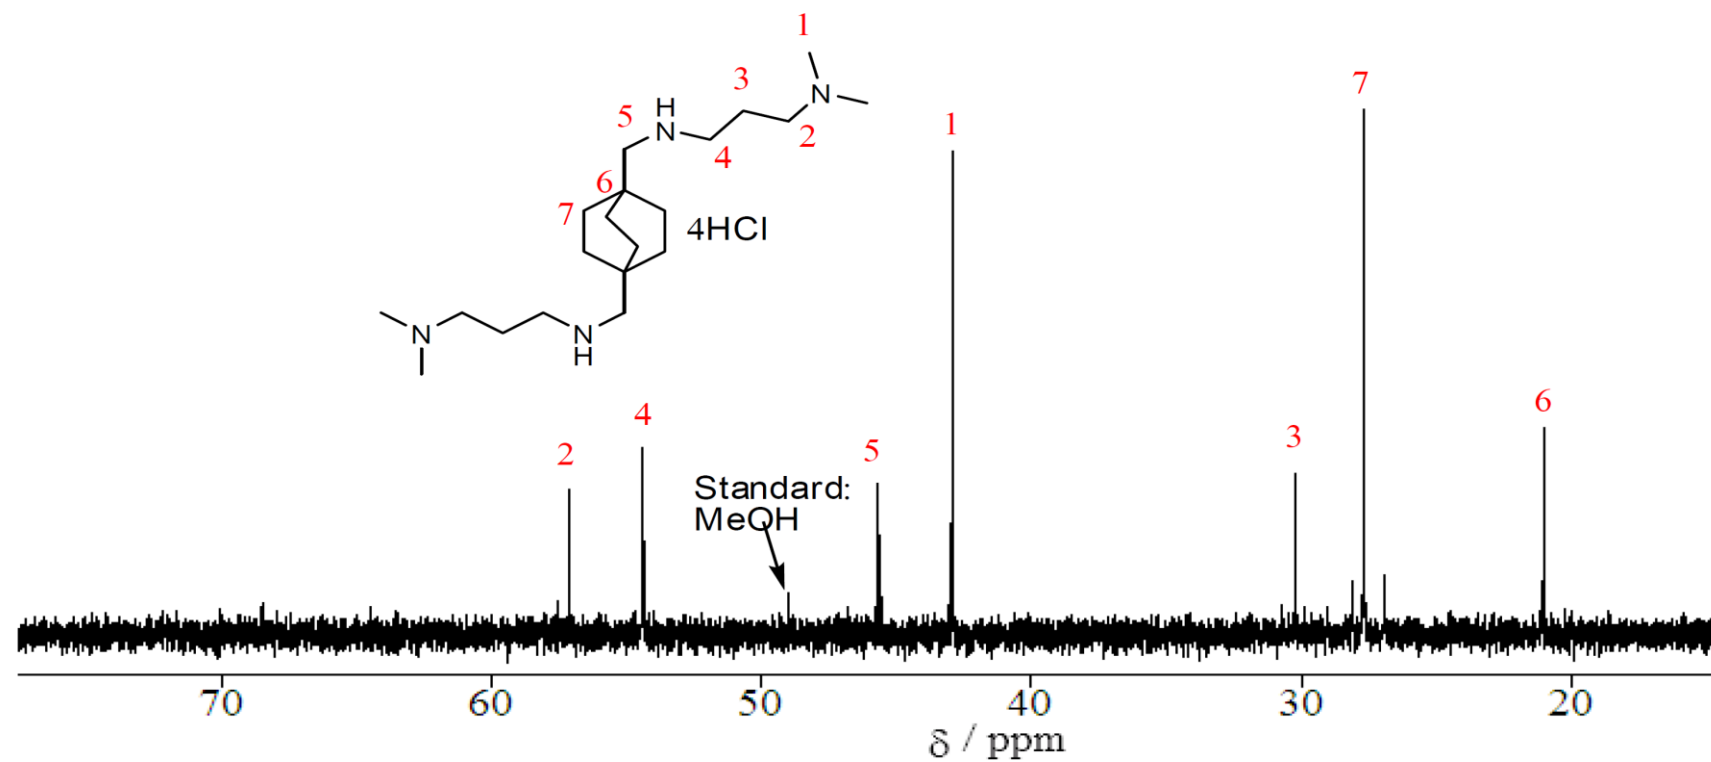

**Figure S13.**  $^{13}\text{C}$  NMR spectrum of **B11** measured in  $\text{D}_2\text{O}$  at 20 °C with MeOH as an internal standard.



[ Mass Spectrum ]  
Data : HR083009 Date : 21-Aug-2009 09:25  
Sample: BCO-5  
Note :  
Inlet : Direct Ion Mode : FFB+  
Spectrum Type : Normal Ion (EF-Linear)  
RT : 1.75 min Scan# : 15  
BP : m/z 93.0552 Int. : 80.62  
Output m/z range : 85.0000 to 190.0000 Cut Level : 0.00 %

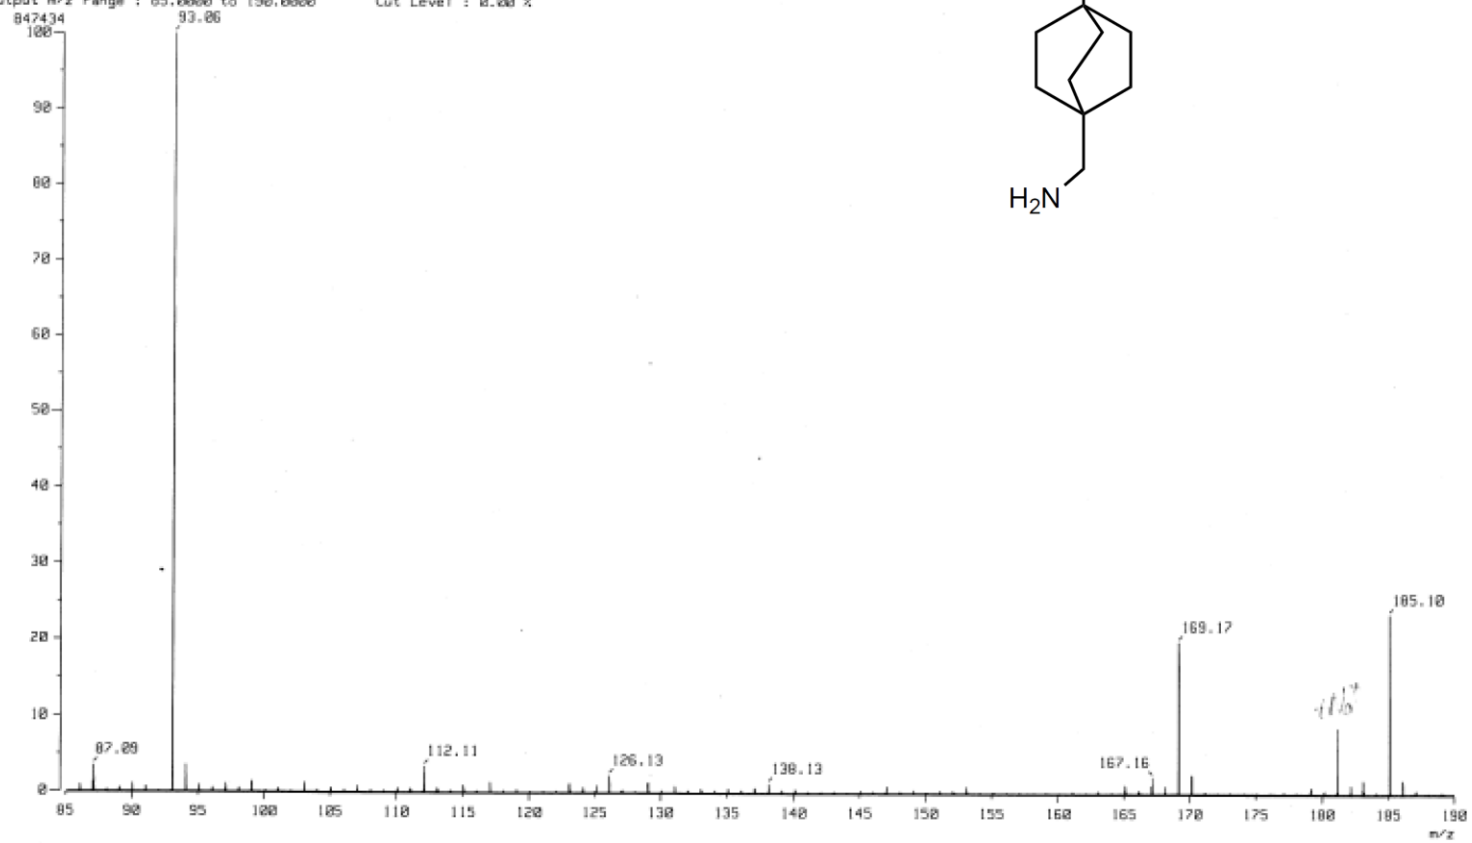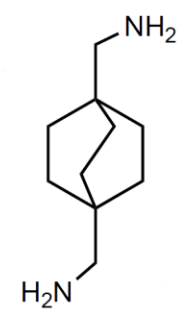

Figure S14. High-Resolution Mass Spectrum of B5.

[ Mass Spectrum ]  
Data : HR009004 Date : 20-Aug-2009 17:13  
Sample: BCO-6  
Note :  
Inlet : Direct Ion Mode : FRR+  
Spectrum Type : Normal Ion [EF-Linear]  
RT : 0.70 min Scan# : 8  
BP : m/z 277.1498 Int. : 21.87  
Output m/z range : 270.0000 to 375.0000 Cut Level : 0.00 %

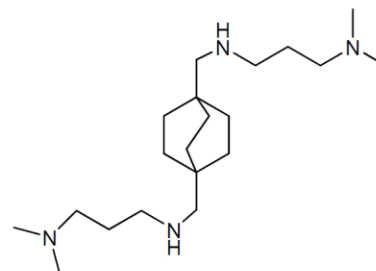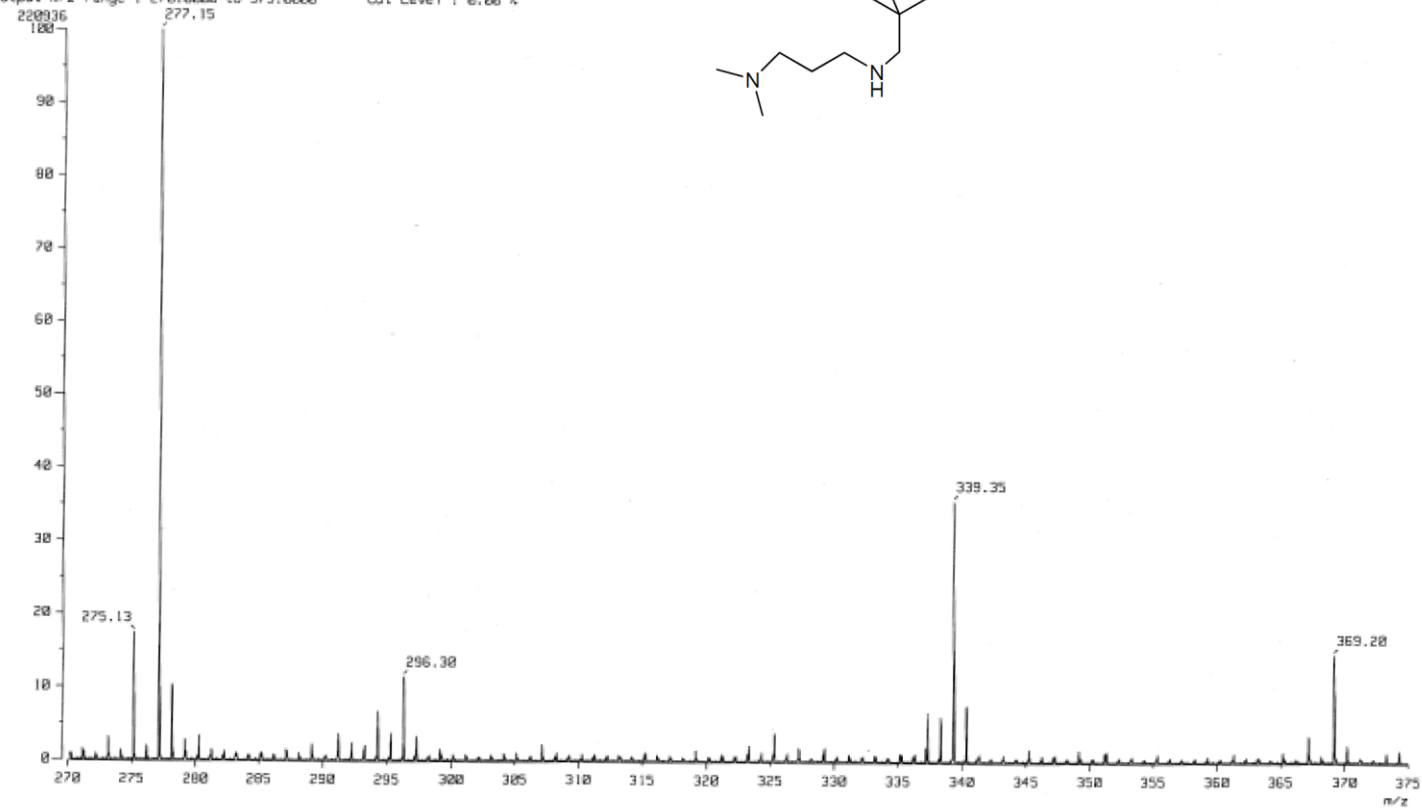

Figure S15. High-Resolution Mass Spectrum of B11.

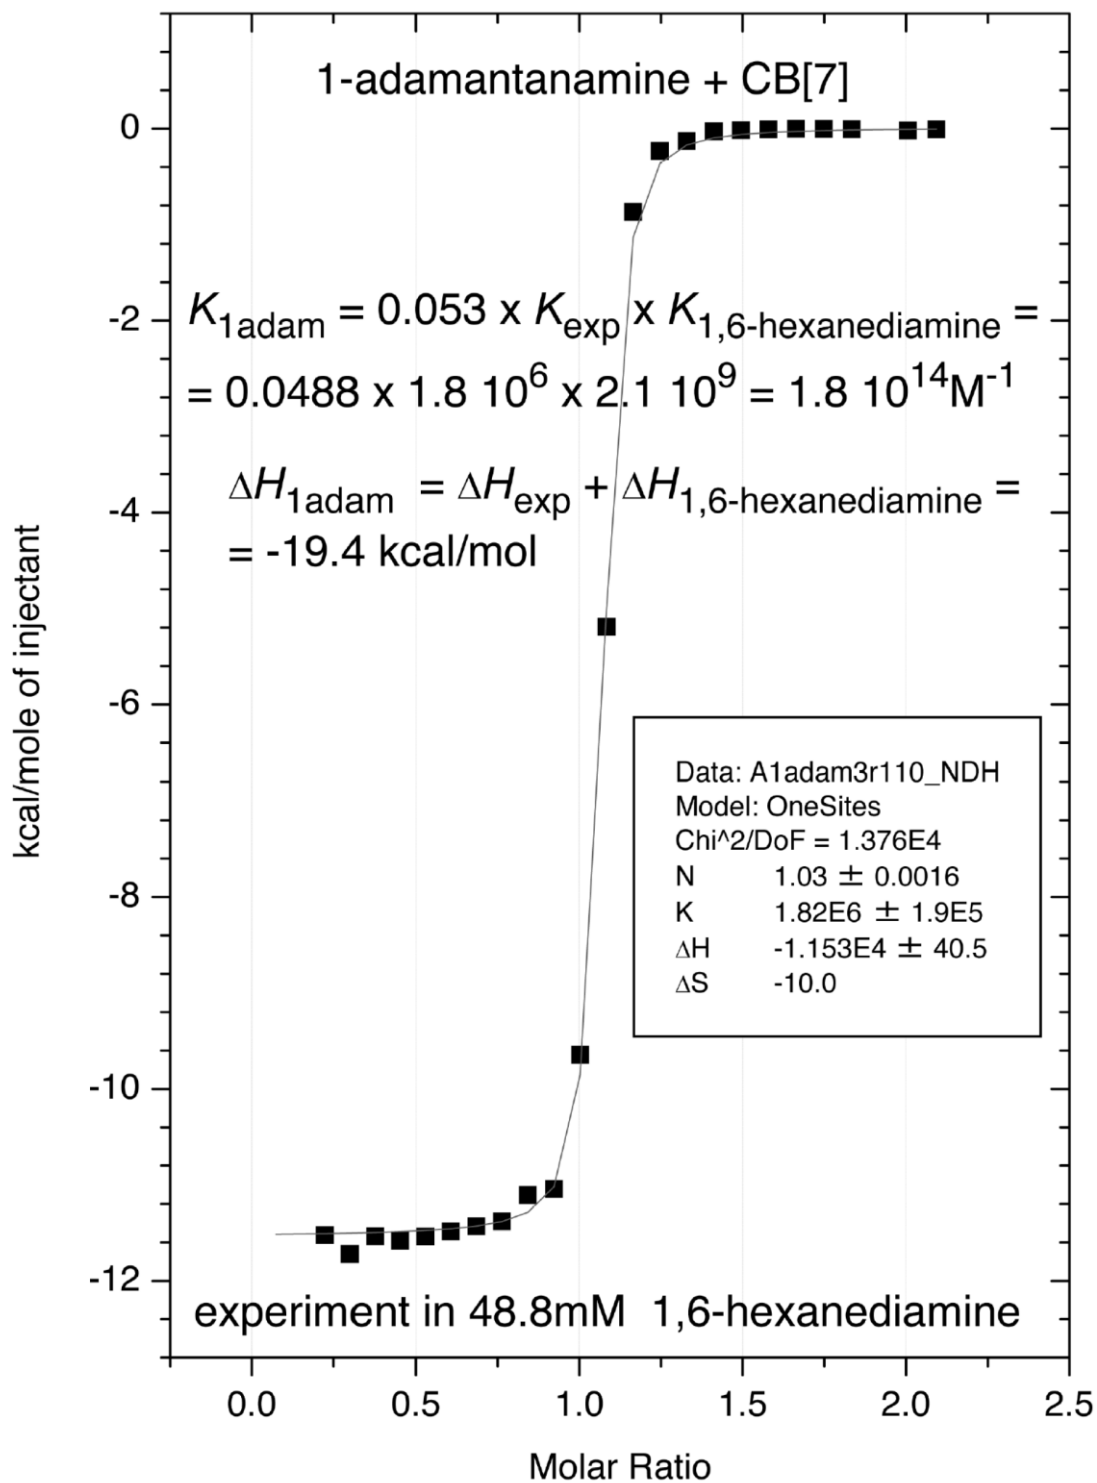

**Figure 16.** Competition ITC experiment on complexation of **A2** with CB[7] in water at 298.15 K in the presence of 1,6-hexanediamine (48.8 mM) as competitor.

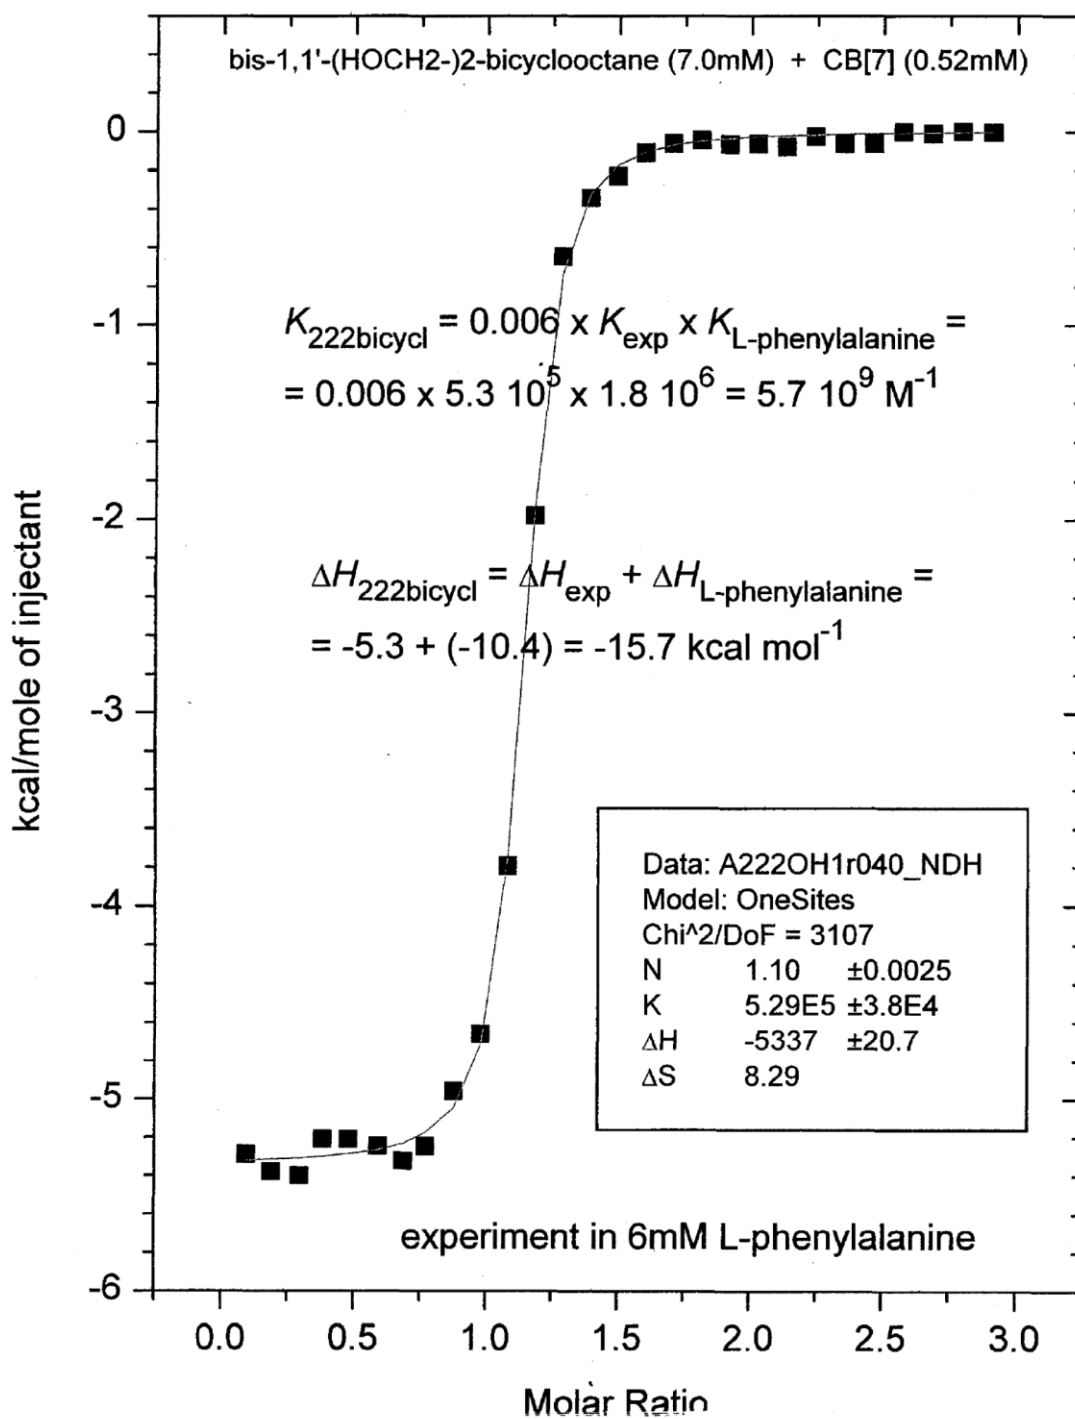

**Figure 17.** Competition ITC experiment on complexation of **B2** with CB[7] in water at 298.15 K in the presence of L-phenylalanine as competitor.

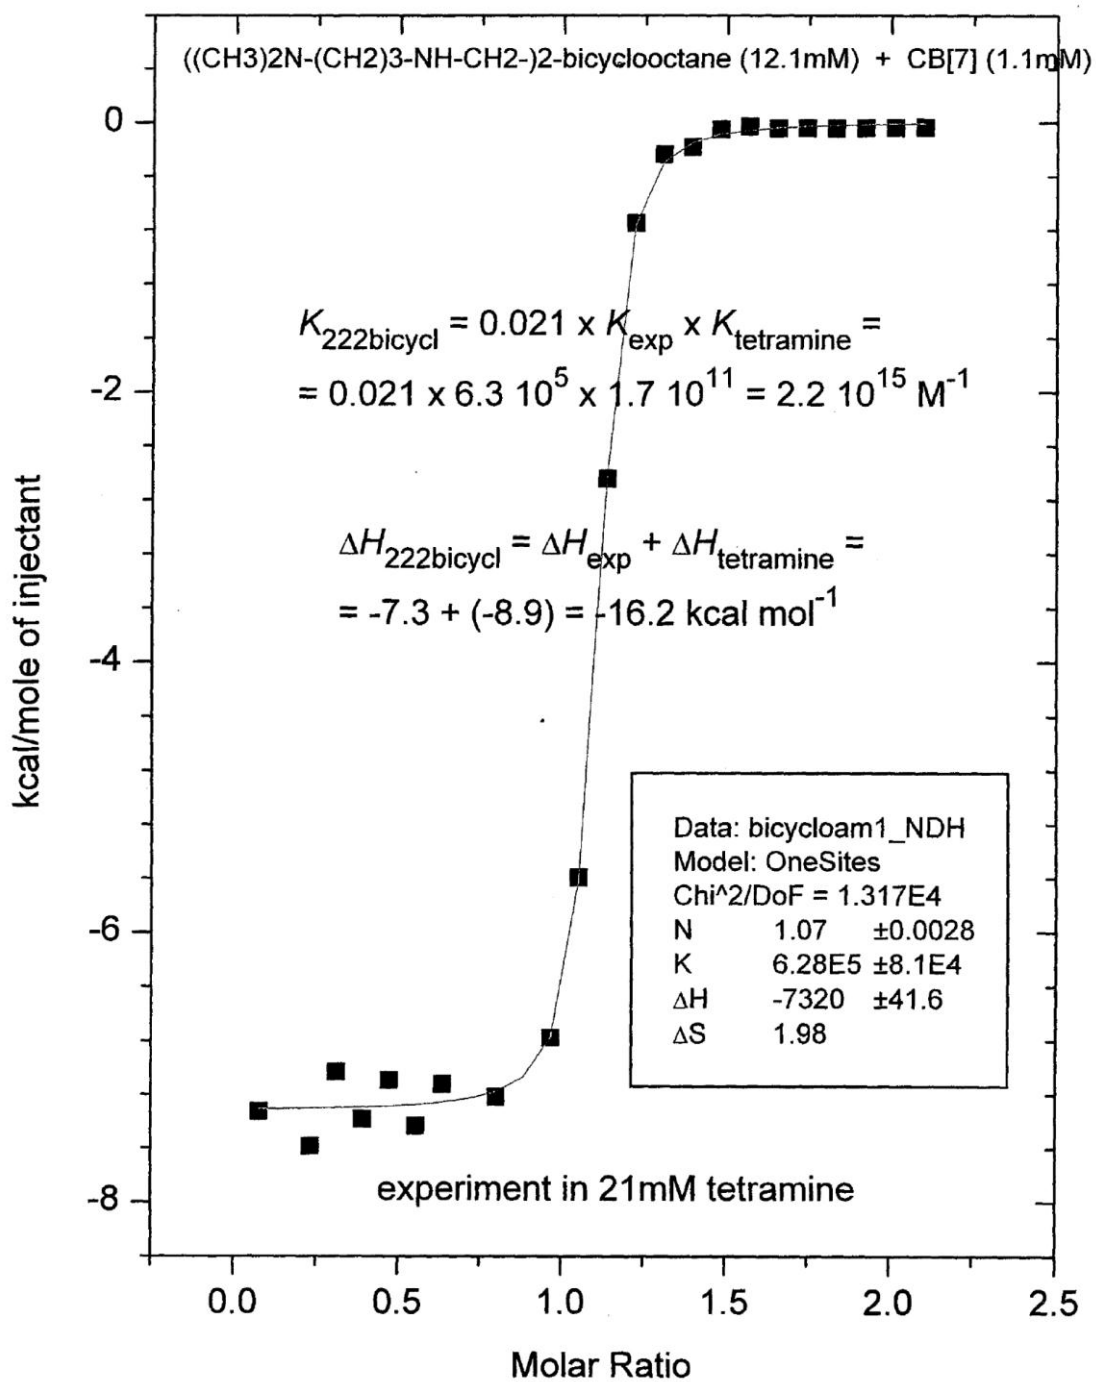

**Figure 18.** Competition ITC experiment on complexation of **B11** with CB[7] in water at 298.15 K in the presence of triethylenetetramine as competitor

## References

- (S1) Roberts, J. D.; Moreland, W. T.; Frazer, W. *J. Org. Chem.* **1953**, 18, 637.
- (S2) Kumar, K.; Wang, S. S.; Sukenik, C. N. *J. Org. Chem.* **1984**, 49, 665.
- (S3) Kauer, J. C.; Benson, R. E.; Parshall, G. W. *J. Org. Chem.*, **1965**, 30, 1431.
- (S4) Cannon, J. G.; Yang, K. W.; Rodriguez, M.; Buckley, J. P. *J. Pharm. Sci.* **1971**, 1534.
